# Supplementary material
Source: Springer Nature journal article supplement (https://www.springermedizin.de/resource/supplementary/12888_2006_157_MOESM4_ESM.pdf/9482012)

# Person-Item Threshold Distribution

(Grouping Set to Interval Length of 0.20 making 70 Groups)

PERSONS

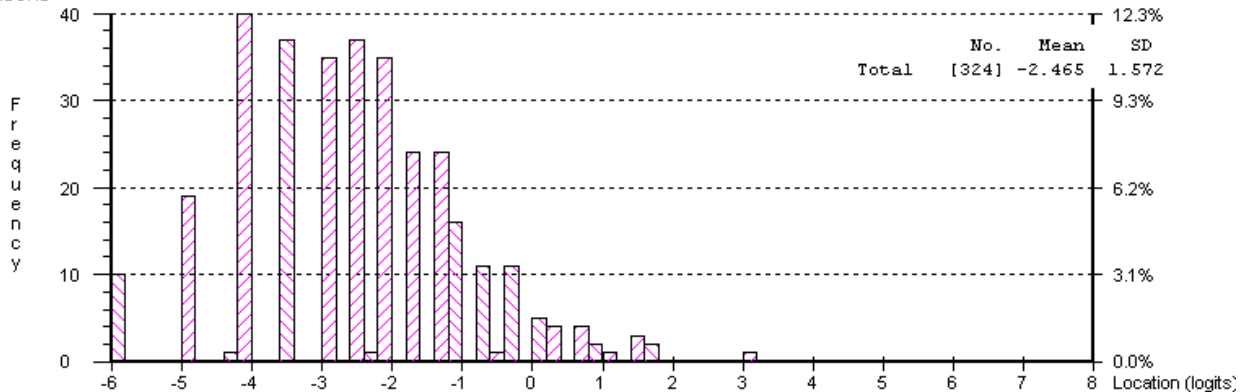

ITEMS

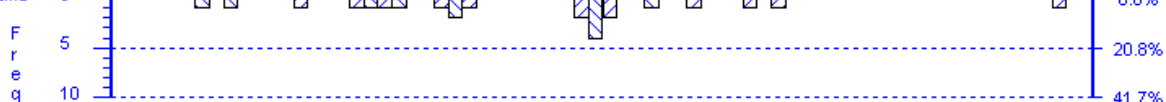

Supplement: MOESM4 [file 9482012]
